# Supplementary material for: Mesoporous Silica Nanoparticles Loaded with Cisplatin and Phthalocyanine for Combination Chemotherapy and Photodynamic Therapy in vitro
Source: Nanomaterials (Basel). 2015 Dec 16;5(4):2302–16. doi: 10.3390/nano5042302 (PMC5304775; doi:10.3390/nano5042302)
Supplement: Supplementary file 1 [file nanomaterials-05-02302-s001.pdf]

## Supplementary Information

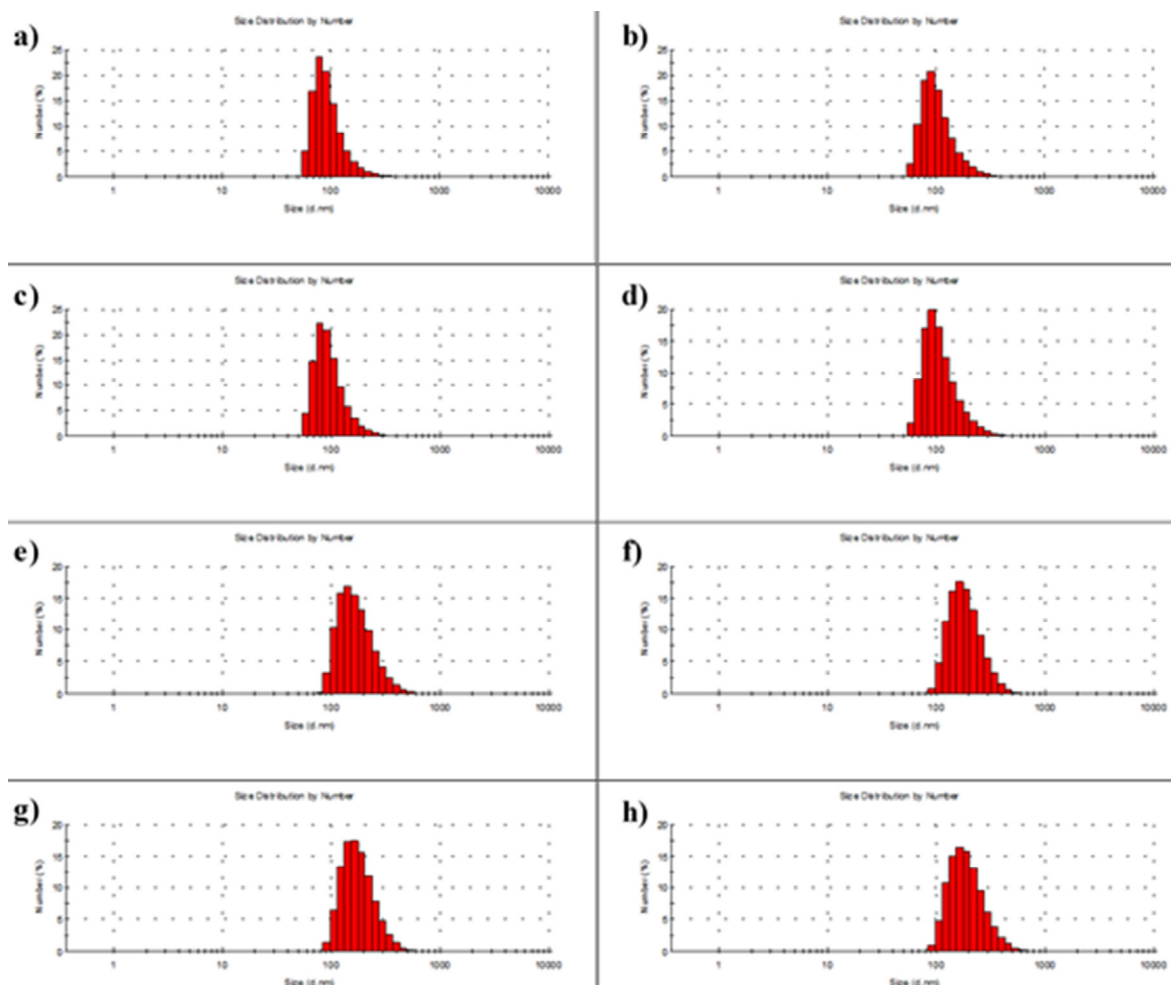

**Figure S1.** Particle size distribution histogram of (a,e) MSNs, (b,f) AIClPc-MSNs, (c,g) cisplatin-MSNs and (d,h) AIClPc/cisplatin-MSNs in 1.0 mM phosphate buffer solution (a–d) or cell culture media (10 v % FBS) (e–h).

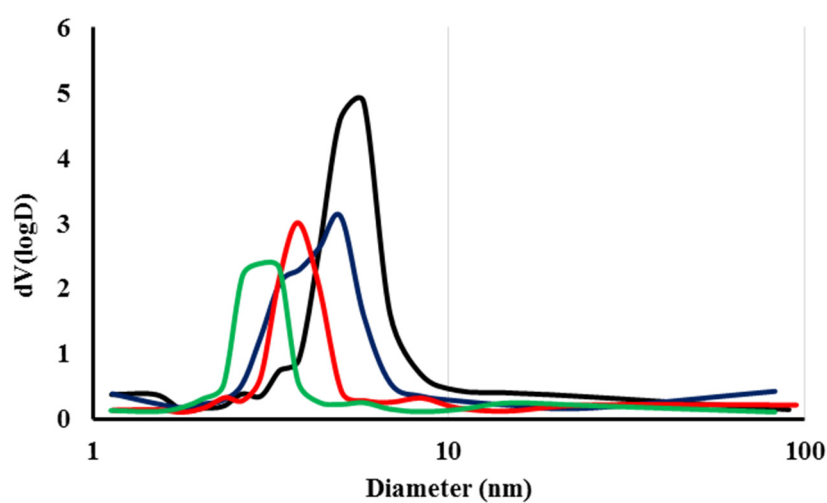

**Figure S2.** Pore size distribution of MSNs (black), AIClPc-MSNs (blue), cisplatin-MSNs (red) and AIClPc/cisplatin-MSNs (green).

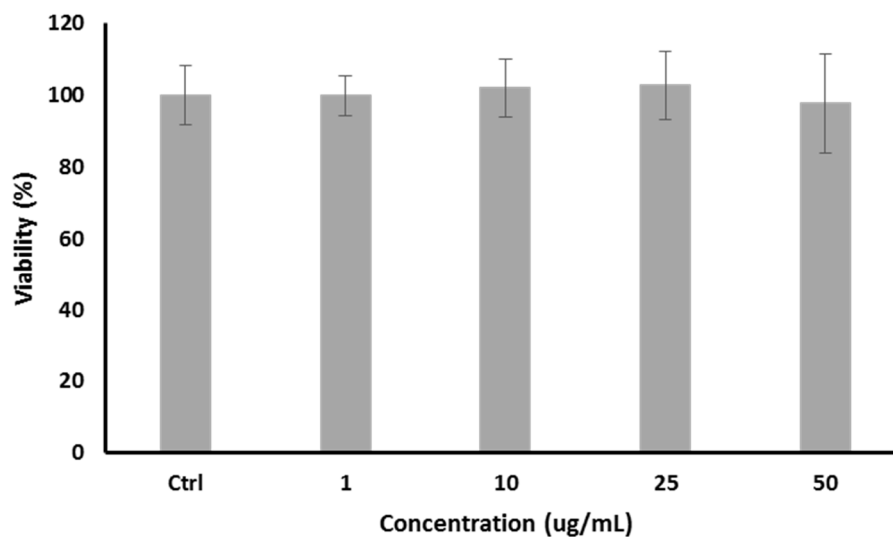

**Figure S3.** Cytotoxicity of MSNs stirred in the presence of DMSO for 48 h, washed twice with DMSO and stored in ethanol.

© 2015 by the authors; licensee MDPI, Basel, Switzerland. This article is an open access article distributed under the terms and conditions of the Creative Commons Attribution license (<http://creativecommons.org/licenses/by/4.0/>).
